# Supplementary material for: Morphology of poly(methyl methacrylate) and polystyrene blends upon Langmuir–Schaefer deposition
Source: Royal Society of Chemistry journal article supplement (doi:10.1039/c0sm00360c), 2010-11-11
Supplement: c0sm00360c.pdf [file c0sm00360c.pdf]

**Electronic Supplementary Information (ESI)**

**for**

**Morphology of poly(methyl methacrylate) and polystyrene blends upon Langmuir-Schaefer deposition**

Maija Pohjakallio, Timo Aho, Kyösti Kontturi, Eero Kontturi\*

School of Science and Technology, Aalto University, Finland

Electronic Supplementary Information includes  $5 \times 5 \mu\text{m}^2$  AFM height images of LS films after 1 deposition step (Figure S1),  $5 \times 5 \mu\text{m}^2$  AFM height images of LS films after 2 deposition steps (Figure S2),  $1 \times 1 \mu\text{m}^2$  AFM images (height and phase) of LS films after 1 inverse deposition step where LS dipping has been performed through water onto the polymer blend monolayer (Figure S3), and  $5 \times 5 \mu\text{m}^2$  AFM height image of an LS film after 1 deposition step at lower surface pressure compared with an AFM image of an LS film at normal surface pressure but with inverse dipping through water (Figure S4).

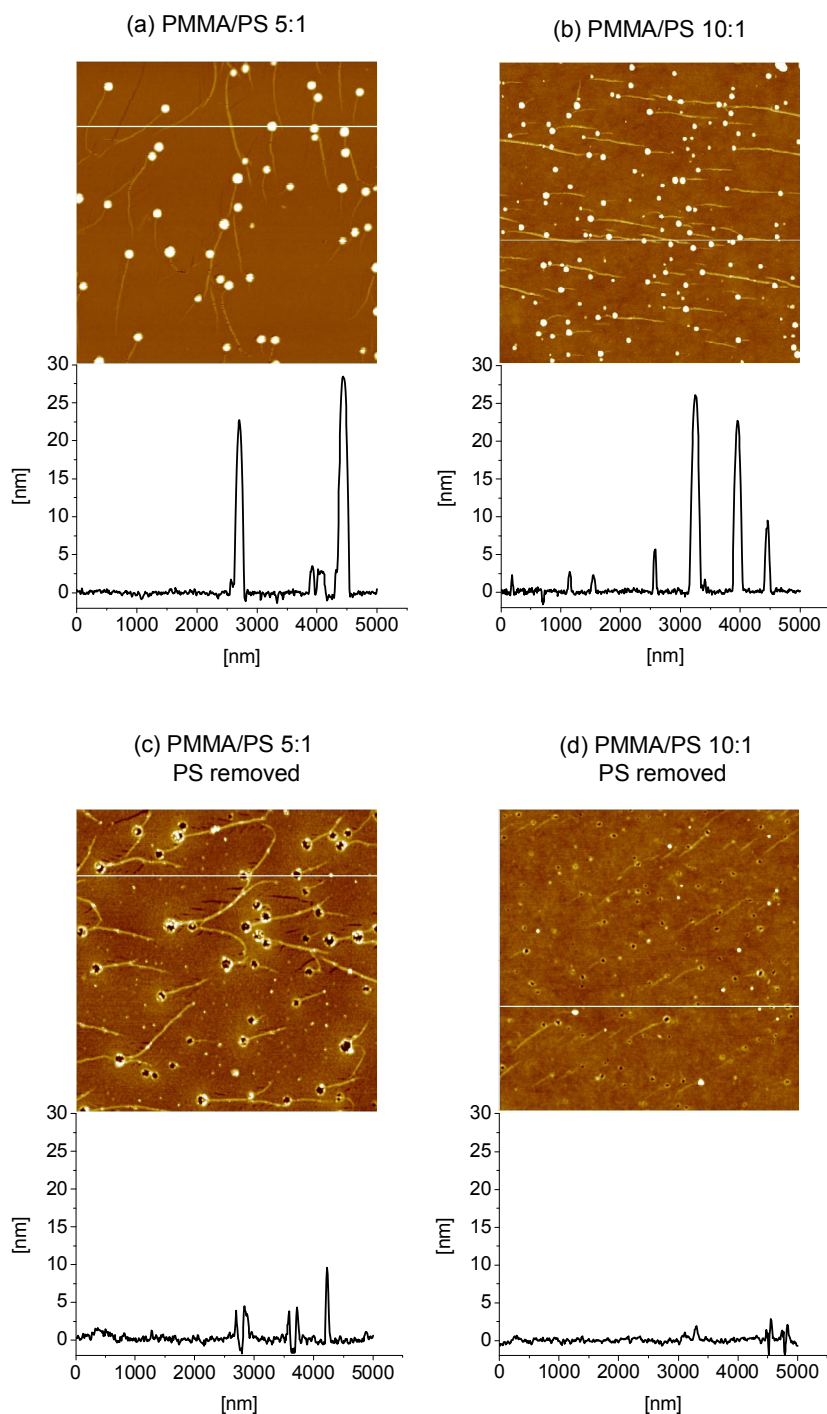

Figure S1. 5×5 μm<sup>2</sup> AFM images of LS films after 1 deposition step: (a) PMMA/PS ratio 5:1, (b) PMMA/PS ratio 10:1, (c) same film as (a) but PS has been removed by cyclohexane immersion, (d) same film as (b) but PS has been removed by cyclohexane immersion. A white line in the images indicates the location of a representative height scan which is shown below each image.

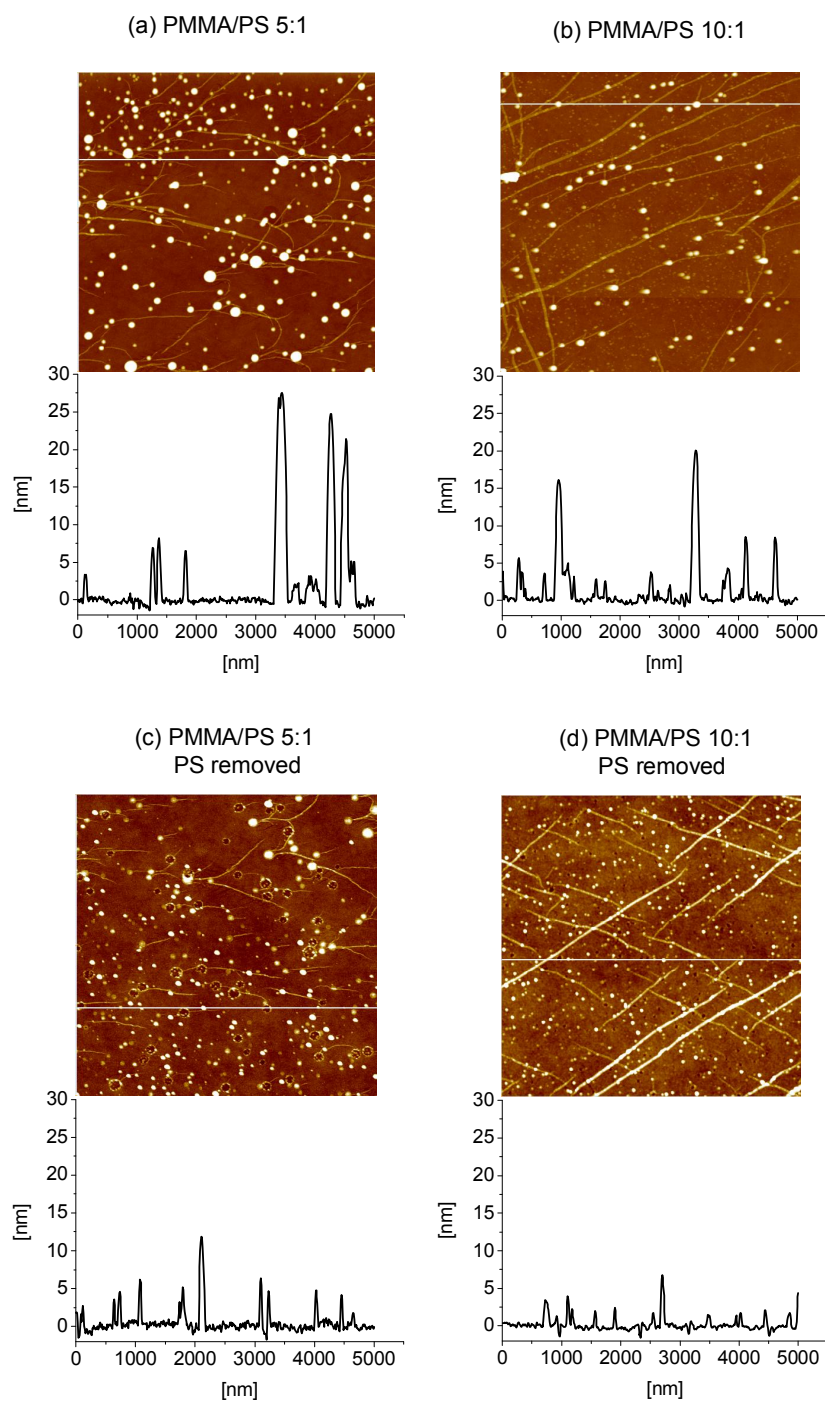

Figure S2.  $5 \times 5 \mu\text{m}^2$  AFM images of LS films after 2 deposition steps: (a) PMMA/PS ratio 5:1, (b) PMMA/PS ratio 10:1, (c) same film as (a) but PS has been removed by cyclohexane immersion, (d) same film as (b) but PS has been removed by cyclohexane immersion. A white line in the images indicates the location of a representative height scan which is shown below each image.

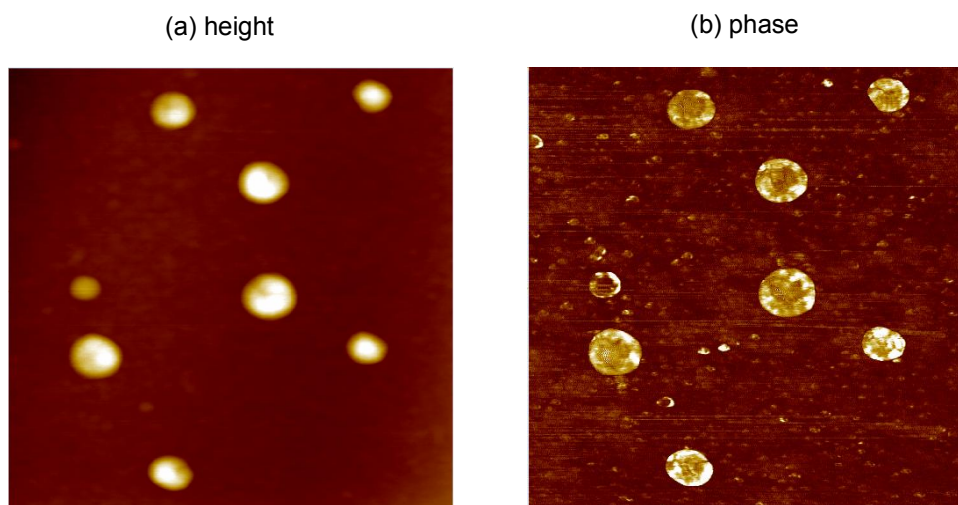

Figure S3.  $1 \times 1 \mu\text{m}^2$  AFM images of an LS film from PMMA/PS of 10:1 mass ratio deposited *via* inverse dipping, *i.e.*, the substrate has been transferred to the monolayer on the water surface through water and not through air as is the case in normal dipping: (a) height image, (b) phase image.

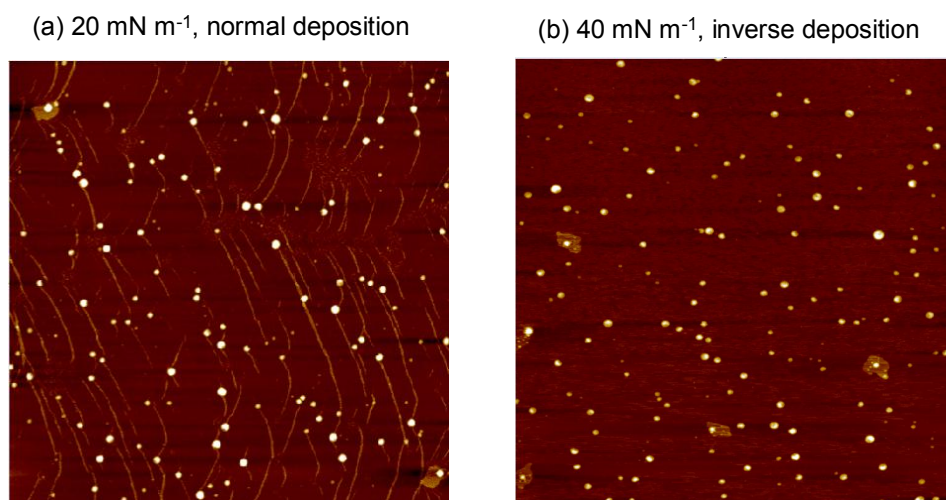

Figure S4.  $5 \times 5 \mu\text{m}^2$  AFM images of an LS film from PMMA/PS of 10:1 mass ratio deposited (a) *via* normal dipping, *i.e.*, transferring the substrate to the water surface through air but the deposition has been performed at a lower surface pressure ( $20 \text{ mN m}^{-1}$ ), and (b) *via* inverse dipping, *i.e.*, the substrate has been transferred to the water surface through water and the deposition has been performed at normal surface pressure ( $40 \text{ mN m}^{-1}$ ).
